# Supplementary material
Source: HighWire-hosted journal article supplement (https://www.annfammed.org/highwire/filestream/8850/field_highwire_adjunct_files/0/Yawn_Supp_Apps.pdf)
Supplement: Yawn_Supp_Apps.pdf [file Yawn_Supp_Apps.pdf]

Supplemental materials for:

Yawn BP, Wollan P, Rank M, Bertram S, Juhn Y, Pace W. Use of asthma APGAR tools in primary care practices: a cluster-randomized controlled trial. *Ann Fam Med*. 2018;16(2):100-110.

Supplemental:

Supplemental Figure 1—Asthma APGAR Care Algorithm

Supplemental Figure 2—Clinician questions for Asthma APGAR

Supplemental Figure 3 ---Map of sites that completed the study

Supplemental Figure 4---Changes in 6-month rates of asthma-related ED, urgent visits and hospitalizations by age group.

Supplemental Table 1—Baseline patient characteristics by randomization status and age group.

Supplemental Table 2—Logistic regression models for changes in 6-month rates of asthma-related ED, urgent visits and hospitalizations by age group

Supplemental Table 3--Practice adherence to asthma guideline elements

Supplemental Table 4—Asthma medications prescribed

Supplemental Figure 1. Asthma APGAR care algorithm

**Algorithm**

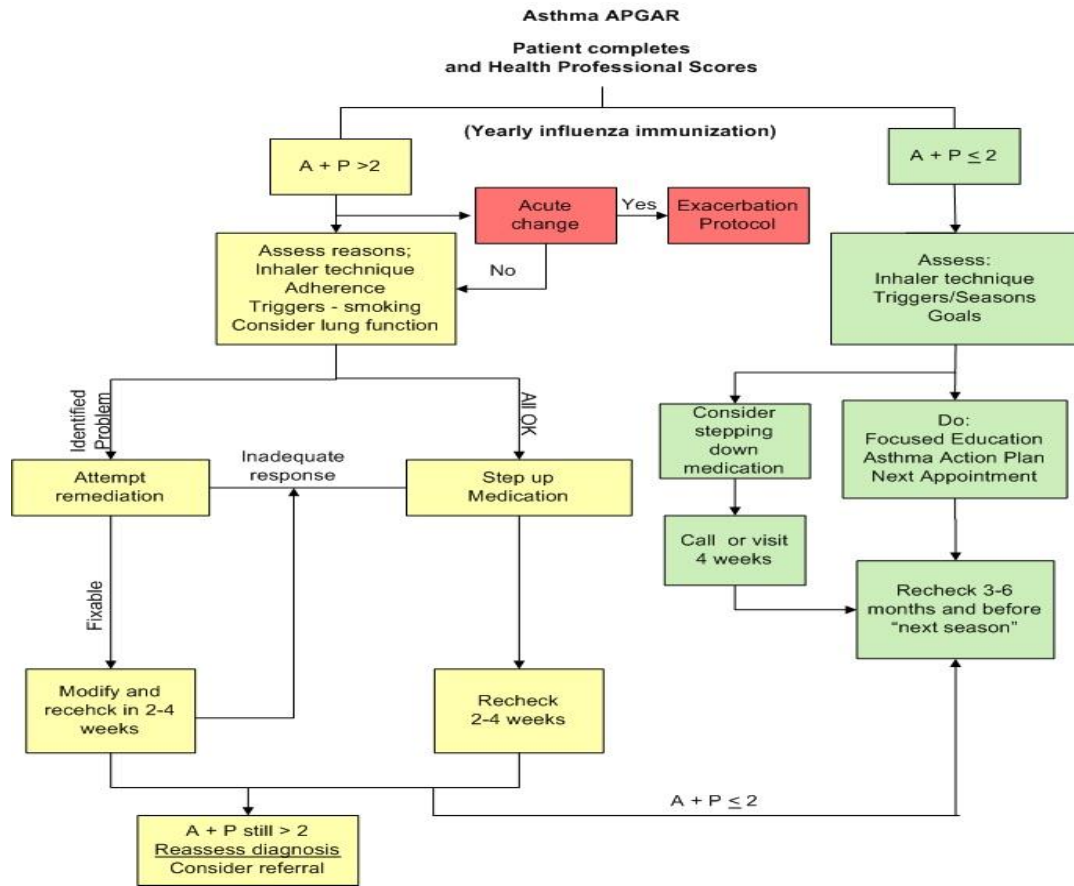

## Supplemental Figure 2: Asthma APGAR follow up

### Activity follow up questions:

- What have you given up due to asthma?
- What would you like to do that you can't, because of asthma?

### Persistence follow up questions:

- Has the frequency and severity of your daytime symptoms been similar over the last 2 months?
- Has the frequency and severity of your nighttime symptoms been similar over the last 2 months?

### Medication follow up questions:

- Would you like to know the difference between rescue and controller medication?  
*Y/N/Unsure*
- Do you have or use a rescue medication? *Y/N/Don't know*
  - Show me medication or describe it.
  - How often do you use your rescue medication?
- What do you do when you feel you need a rescue medication? \_\_\_\_\_
- Do you have or use a prevention medication? *Y/N/Don't know*
  - Show me medication or describe it.
  - How often do you use your prevention medication?
- Demonstrate inhaler technique.
- Does the cost of your treatment affect your taking/buying asthma medication?  
*Y/N/Unsure*

### Response to therapy follow up questions:

- Do you think your asthma therapy helps? *Y/N/Unsure*
- How often do you have to refill your rescue inhaler?
- Which ones help?
  - Avoiding triggers? *Y/N*
  - Rescue inhaler? *Y/N*
  - Preventive medicines? *Y/N*

What else helps your asthma? \_\_\_\_\_

### Supplemental Figure 3. Sites completing the Asthma Tools Study

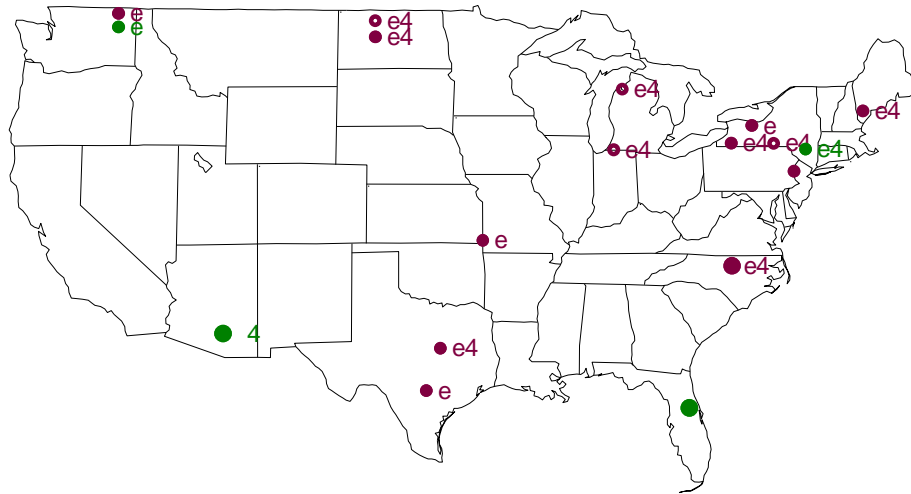

Large dots indicate urban location, pop>250K (N=3)  
Hollow dots indicate residency practice (N=4)  
Red indicates FM (N=14), green Pediatrics (N=4)  
e indicates EMR in use (N=15)  
4 indicates 4 or more physicians (N=12)

**Supplemental Figure 4. End of enrollment period asthma related ED, urgent care or hospital visits in past 6 months comparing intervention to usual care by age group.**

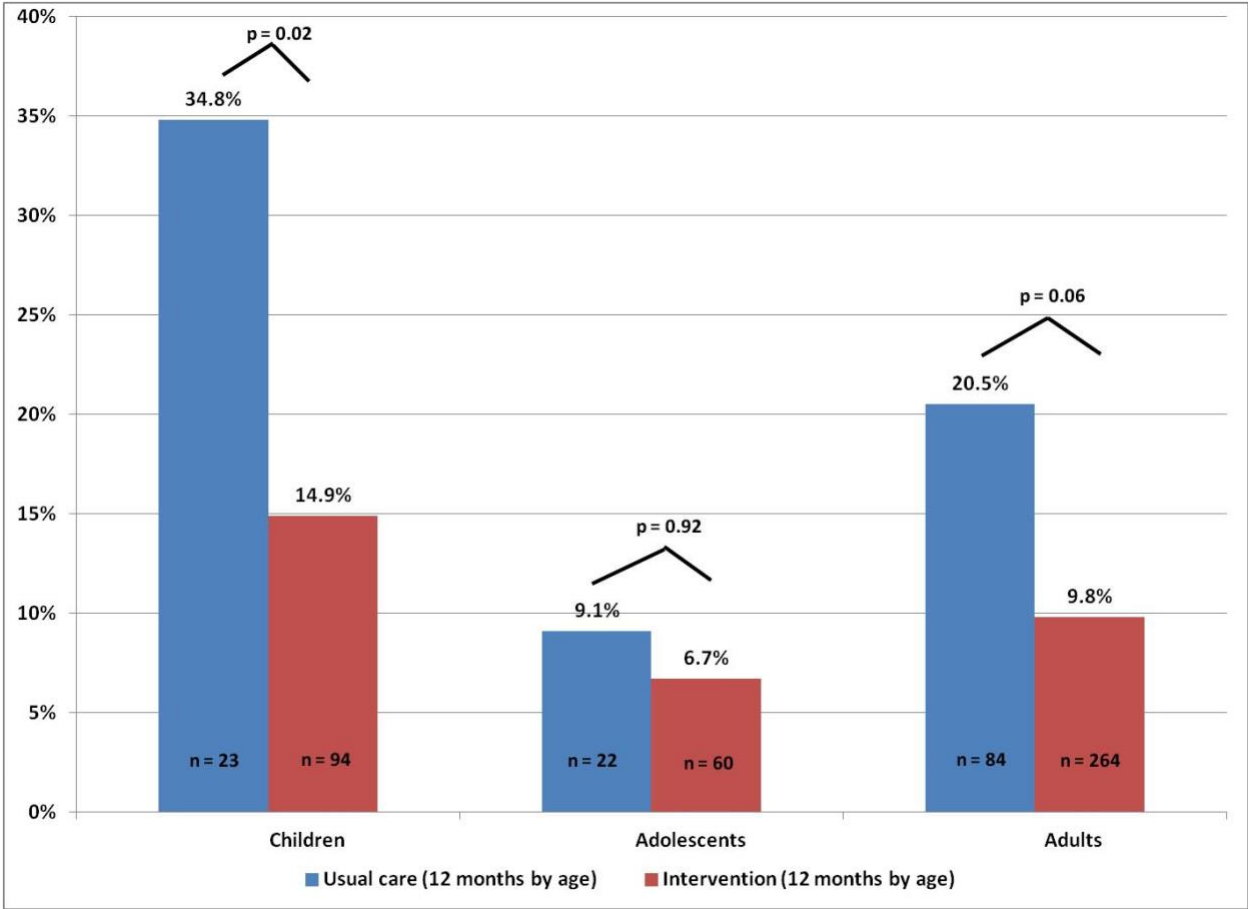

**Supplemental Table 1. Baseline demographics and behaviors, by age group: A= adults, B=children and C=adolescents**

| <b>A. Adults</b>                                                                         |                                                                                                               |                     |                     |                                    |
|------------------------------------------------------------------------------------------|---------------------------------------------------------------------------------------------------------------|---------------------|---------------------|------------------------------------|
| Characteristics by enrollment group                                                      | Available for baseline analysis N = 518<br>Those who returned the baseline survey, 80.1% of enrolled patients |                     |                     |                                    |
|                                                                                          | Intervention<br>N=312                                                                                         | Usual Care<br>N=105 | Transition<br>N=101 | P value for those with differences |
| Age in yrs: Mean                                                                         | 29.1                                                                                                          | 26.6                | 28.7                |                                    |
| *denotes statistical difference across group                                             | N (%)                                                                                                         | N (%)               | N (%)               |                                    |
| Race/ethnicity by % of total                                                             |                                                                                                               |                     |                     |                                    |
| White                                                                                    | 93.3                                                                                                          | 82.9                | 88.1                | P = .03                            |
| Black                                                                                    | 3.8                                                                                                           | 14.3                | 10.9                | P < .001                           |
| Other/none                                                                               | 2.9                                                                                                           | 2.8                 | 1.0                 |                                    |
| Hispanic*                                                                                | 3.2                                                                                                           | 1.9                 | 8.9                 | P = .02                            |
| Family income/year by % of total                                                         |                                                                                                               |                     |                     |                                    |
| <\$10,000                                                                                | 15.7                                                                                                          | 18.1                | 15.8                |                                    |
| \$10,000 to \$49,999                                                                     | 35.9                                                                                                          | 32.4                | 35.6                |                                    |
| ≥ \$50,000                                                                               | 45.2                                                                                                          | 47.6                | 48.5                |                                    |
| Not reported                                                                             | 3.2                                                                                                           | 1.9                 | 0                   |                                    |
| BMI                                                                                      |                                                                                                               |                     |                     |                                    |
| % obese*                                                                                 | 48.9                                                                                                          | 45.7                | 51.2                |                                    |
| Secondhand smoke by %                                                                    |                                                                                                               |                     |                     |                                    |
| ever 5-7 days/ week                                                                      | 63.1                                                                                                          | 63.8                | 60.4                |                                    |
| now 5-7 days/week                                                                        | 23.1                                                                                                          | 18.1                | 19.8                |                                    |
| % smoking-current                                                                        |                                                                                                               |                     |                     |                                    |
| Ever                                                                                     | 40.1                                                                                                          | 33.3                | 31.7                |                                    |
| Activity levels by %                                                                     |                                                                                                               |                     |                     |                                    |
| strenuous activity                                                                       |                                                                                                               |                     |                     |                                    |
| ≥3 x a week, 15 min.                                                                     | 25.6                                                                                                          | 27.6                | 20.8                |                                    |
| ≥ 5 x a week, 15 min                                                                     | 9.9                                                                                                           | 12.4                | 9.9                 |                                    |
| Allergy tests ever, %yes                                                                 | 54.2                                                                                                          | 59.0                | 60.4                |                                    |
| Asthma control by ACT score                                                              |                                                                                                               |                     |                     |                                    |
| % not in control—score <20                                                               | 60.6                                                                                                          | 63.1                | 64.4                |                                    |
| % who thought they needed asthma care and could not get it                               | 16.8                                                                                                          | 18.1                | 29.3                | P = .02                            |
| % with asthma-related visit to ED, urgent care or hospital in 6 months before enrollment | 17.5                                                                                                          | 22.1                | 15.9                |                                    |
|                                                                                          |                                                                                                               |                     |                     |                                    |

| <b>B. Children.</b>                                                                      |                                                                                                               |                    |                    |                                    |
|------------------------------------------------------------------------------------------|---------------------------------------------------------------------------------------------------------------|--------------------|--------------------|------------------------------------|
| Characteristics by enrollment group                                                      | Available for baseline analysis N = 191<br>Those who returned the baseline survey, 78.0% of enrolled patients |                    |                    |                                    |
|                                                                                          | Intervention<br>N=103                                                                                         | Usual Care<br>N=27 | Transition<br>N=61 | P value for those with differences |
| Age in yrs: Mean                                                                         | 29.1                                                                                                          | 26.6               | 28.7               |                                    |
| *denotes statistical difference across group                                             | N (%)                                                                                                         | N (%)              | N (%)              |                                    |
| Race/ethnicity by % of total                                                             |                                                                                                               |                    |                    |                                    |
| White                                                                                    | 87.4                                                                                                          | 33.3               | 57.4               | P < .001                           |
| Black                                                                                    | 8.7                                                                                                           | 55.6               | 37.7               | P < .001                           |
| Other/none                                                                               | 3.9                                                                                                           | 11.1               | 4.9                |                                    |
| Hispanic*                                                                                | 18.4                                                                                                          | 14.8               | 49.2               | P < .001                           |
| Family income/year by % of total                                                         |                                                                                                               |                    |                    |                                    |
| <\$10,000                                                                                | 9.7                                                                                                           | 29.6               | 23.0               | P = .01                            |
| \$10,000 to \$49,999                                                                     | 27.2                                                                                                          | 40.7               | 60.7               | P < .001                           |
| ≥ \$50,000                                                                               | 61.2                                                                                                          | 22.2               | 14.8               | P < .001                           |
| Not reported                                                                             | 1.9                                                                                                           | 7.4                | 1.6                |                                    |
| BMI                                                                                      |                                                                                                               |                    |                    |                                    |
| % obese*                                                                                 | 22.6                                                                                                          | 12.8               | 20.3               |                                    |
| Secondhand smoke by %                                                                    |                                                                                                               |                    |                    |                                    |
| ever 5-7 days/ week                                                                      | 16.5                                                                                                          | 37.0               | 21.3               |                                    |
| now 5-7 days/week                                                                        | 10.7                                                                                                          | 25.9               | 11.5               |                                    |
| % smoking-current                                                                        |                                                                                                               |                    |                    |                                    |
| Ever                                                                                     | -                                                                                                             | -                  | -                  |                                    |
| Activity levels by % strenuous activity                                                  |                                                                                                               |                    |                    |                                    |
| ≥3 x a week, 15 min.                                                                     | 68.9                                                                                                          | 63.0               | 57.4               |                                    |
| > 5 x a week, 15 min                                                                     | 36.9                                                                                                          | 33.3               | 29.5               |                                    |
| Allergy tests ever, %yes                                                                 | 48.5                                                                                                          | 40.7               | 29.5               |                                    |
| Asthma control by ACT score                                                              |                                                                                                               |                    |                    |                                    |
| % not in control—score <20                                                               | 56.9                                                                                                          | 40.7               | 57.4               |                                    |
| % who thought they needed asthma care and could not get it                               | 5.0                                                                                                           | 3.8                | 8.3                |                                    |
| % with asthma-related visit to ED, urgent care or hospital in 6 months before enrollment | 25.2                                                                                                          | 18.5               | 27.9               |                                    |



| <b>C. Adolescents</b>                                                                    |                                                                                                               |                    |                    |                                    |
|------------------------------------------------------------------------------------------|---------------------------------------------------------------------------------------------------------------|--------------------|--------------------|------------------------------------|
| Characteristics by enrollment group                                                      | Available for baseline analysis N = 134<br>Those who returned the baseline survey, 77.0% of enrolled patients |                    |                    |                                    |
|                                                                                          | Intervention<br>N=81                                                                                          | Usual Care<br>N=25 | Transition<br>N=28 | P value for those with differences |
| Age in yrs: Mean                                                                         | 15.0                                                                                                          | 15.5               | 15.5               |                                    |
| *denotes statistical difference across group                                             | N (%)                                                                                                         | N (%)              | N (%)              |                                    |
| Race/ethnicity by % of total                                                             |                                                                                                               |                    |                    |                                    |
| White                                                                                    | 86.4                                                                                                          | 76.0               | 75.0               | P = .03                            |
| Black                                                                                    | 6.2                                                                                                           | 20.0               | 21.4               |                                    |
| Other/none                                                                               | 7.4                                                                                                           | 4.0                | 3.6                |                                    |
| Hispanic*                                                                                | 13.6                                                                                                          | 20.0               | 53.6               | P < .001                           |
| Family income/year by % of total                                                         |                                                                                                               |                    |                    |                                    |
| <\$10,000                                                                                | 11.1                                                                                                          | 16.0               | 10.7               | P = .02<br>P = .03                 |
| \$10,000 to \$49,999                                                                     | 29.6                                                                                                          | 28.0               | 46.4               |                                    |
| ≥ \$50,000                                                                               | 55.6                                                                                                          | 52.0               | 25.0               |                                    |
| Not reported                                                                             | 3.7                                                                                                           | 4.0                | 17.9               |                                    |
| BMI                                                                                      |                                                                                                               |                    |                    |                                    |
| % obese*                                                                                 | 29.0                                                                                                          | 19.0               | 31.3               |                                    |
| Secondhand smoke by %                                                                    |                                                                                                               |                    |                    |                                    |
| ever 5-7 days/ week                                                                      | 23.5                                                                                                          | 40.0               | 21.4               |                                    |
| now 5-7 days/week                                                                        | 16.0                                                                                                          | 24.0               | 17.9               |                                    |
| % smoking-current                                                                        |                                                                                                               |                    |                    |                                    |
| Ever                                                                                     | 2.5<br>4.9                                                                                                    | 0<br>0             | 0<br>0             |                                    |
| Activity levels by % strenuous activity                                                  |                                                                                                               |                    |                    |                                    |
| ≥3 x a week, 15 min.                                                                     | 59.3                                                                                                          | 52.0               | 39.3               |                                    |
| ≥ 5 x a week, 15 min                                                                     | 40.7                                                                                                          | 24.0               | 21.4               |                                    |
| Allergy tests ever, %yes                                                                 | 43.2                                                                                                          | 44.0               | 50.0               |                                    |
| Asthma control by ACT score                                                              |                                                                                                               |                    |                    |                                    |
| % not in control—score <20                                                               | 57.0                                                                                                          | 52.0               | 42.9               |                                    |
| % who thought they needed asthma care and could not get it                               | 5.2                                                                                                           | 4.2                | 11.5               |                                    |
| % with asthma-related visit to ED, urgent care or hospital in 6 months before enrollment | 12.3                                                                                                          | 16.0               | 21.4               |                                    |

**Supplemental Table 2. Hospital, urgent care or ED asthma-related visit past 6 months, regression model with random effects**

|                             | Value  | Std.Error | t-value | p-value | OR (CI)        |
|-----------------------------|--------|-----------|---------|---------|----------------|
| (Intercept)                 | -1.914 | .482      | -3.971  | <.001   |                |
| Baseline                    | 1.733  | .291      | 5.949   | <.001   | 5.7 (3.2,10.0) |
| Intervention vs. Transition | -.788  | .412      | -1.913  | .048    | .5 (0.2, .98)  |
| Intervention vs. Control    | .728   | .364      | 2.002   | .04     | 2.1 (1.01,4.2) |
| Sex Male vs. Female         | -.193  | .332      | -.580   | .56     |                |
| Children vs. Adults         | 0.611  | .378      | 1.619   | .11     |                |
| Teens vs. Adults            | -.554  | .552      | -1.004  | .32     |                |
| Non-Black vs. Black         | -.341  | .388      | -.878   | .38     |                |
| Income> 50K vs all others   | -.838  | .293      | -2.860  | .004    | .4 (0.2,0.8)   |
| Hispanic vs non-Hispanic    | .172   | .485      | .355    | .72     |                |

### Supplemental Table 3. Adherence to Elements of Asthma Guidelines

|                                                                                  | Intervention<br>N = 632 | Control<br>N = 208 | Transition<br>N = 226 | Significance of change in<br>intervention vs control (12 months<br>– baseline) |
|----------------------------------------------------------------------------------|-------------------------|--------------------|-----------------------|--------------------------------------------------------------------------------|
| <b>Change in % of assessment of specific elements from baseline to 12-months</b> |                         |                    |                       |                                                                                |
| Adherence to 3 or more elements                                                  | 20.7%                   | -1.9%              | 10.2%                 | P < .001                                                                       |
| <b>Specific elements:</b>                                                        |                         |                    |                       |                                                                                |
| Control assessed                                                                 | 55.2%                   | 0.5%               | 19.5%                 | P < .0001                                                                      |
| Allergies assessed                                                               | 15.8%                   | -11.1%             | -.05%                 | P < .0001                                                                      |
| Inhaler technique observed                                                       | 1.2%                    | -5.2%              | 1.7%                  | P = .03                                                                        |
| Asthma action plan completed                                                     | 3.6%                    | 1.4%               | 4.0%                  | P = .51                                                                        |
| Medication adherence assessed                                                    | 32.3%                   | 25.4%              | 37.6%                 | P = .13                                                                        |

**Supplemental Table 4. Medications prescribed, comparing baseline and 12-months by group using medical record data**

**N = 1063, 99.4% of enrolled patients**

|                                              |           | Intervention<br>N = 630 (%) | Control<br>N = 208 (%) | Transition<br>N = 225 (%) |
|----------------------------------------------|-----------|-----------------------------|------------------------|---------------------------|
| No asthma medications recorded               |           |                             |                        |                           |
|                                              | Baseline  | 69 (10.9)                   | 18 (8.7)               | 14 (6.2)                  |
|                                              | 12-months | 9 (1.4)                     | 8 (3.8)                | 0                         |
| SABA only                                    |           |                             |                        |                           |
|                                              | Baseline  | 88 (13.9)                   | 31 (14.9)              | 17 (7.5)                  |
|                                              | 12-months | 55 (8.7)                    | 24 (11.5)              | 6 (2.7)                   |
| Daily anti-inflammatory                      |           |                             |                        |                           |
|                                              | Baseline  | 245 (38.8)                  | 62 (29.8)              | 87 (38.5)                 |
|                                              | 12-months | 258 (40.8)                  | 65 (31.3)              | 93 (41.2)                 |
| Combination ICS + long acting bronchodilator |           |                             |                        |                           |
|                                              | Baseline  | 230 (36.4)                  | 98 (47.1)              | 107 (47.3)                |
|                                              | 12-months | 308 (48.9)                  | 112 (53.8)             | 129 (57.1)                |
